# Supplementary material for: A serendipitous crossed aldol reaction in the ligand periphery of a Ru(ii) polypyridyl complex in silica bed: prospects for delivering anticancer agents for photoactivated chemotherapy
Source: Royal Society of Chemistry journal article supplement (doi:10.1039/d4dt02337d), 2024-01-01
Supplement: d4dt02337d1.pdf [file d4dt02337d1.pdf]

## Electronic Supplementary Information

### A serendipitous crossed aldol reaction in the ligand periphery of a Ru(II) polypyridyl complex in silica bed: prospects for delivering anticancer agents for photoactivated chemotherapy

Ramranjan Mishra,<sup>a</sup> Pritha Chatterjee,<sup>a</sup> Ray J. Butcher<sup>b</sup> and Ashis K. Patra\*<sup>a</sup>

<sup>a</sup>Department of Chemistry, Indian Institute of Technology Kanpur, Kanpur 208016, Uttar Pradesh, India. E-mail: [akpatra@iitk.ac.in](mailto:akpatra@iitk.ac.in)

<sup>b</sup>Department of Chemistry, Howard University, Washington, DC 20059, USA

| Contents                                                                                                           | Pages |
|--------------------------------------------------------------------------------------------------------------------|-------|
| <b>Figure S1.</b> Comparison of the ESI-MS of [1] and [1-Ac].                                                      | 2     |
| <b>Figure S2.</b> <sup>1</sup> H NMR spectrum of [1-Ac] in DMSO- <i>d</i> <sub>6</sub> .                           | 2     |
| <b>Figure S3.</b> Expanded aliphatic region of the <sup>1</sup> H NMR of [1-Ac] in DMSO- <i>d</i> <sub>6</sub> .   | 3     |
| <b>Figure S4.</b> Expanded aliphatic region of the <sup>1</sup> H NMR of [1-Ac] in CD <sub>3</sub> OD.             | 3     |
| <b>Figure S5.</b> <sup>13</sup> C NMR spectra of [1-Ac] in DMSO- <i>d</i> <sub>6</sub> .                           | 4     |
| <b>Figure S6.</b> <sup>1</sup> H- <sup>13</sup> C HSQC spectra of [1-Ac] in DMSO- <i>d</i> <sub>6</sub> .          | 4     |
| <b>Figure S7.</b> Electronic absorption spectra and cyclic voltammetry of [1-Ac].                                  | 5     |
| <b>Table S1.</b> Selected bond distances (Å) of [1-Ac].                                                            | 5     |
| <b>Table S2.</b> Selected bond angles (degree).                                                                    | 6     |
| <b>Table S3.</b> Crystallographic parameters for [1-Ac].                                                           | 7     |
| <b>Figure S8.</b> ESI-MS of the photoproduct of [1-Ac] in DMSO- <i>d</i> <sub>6</sub> on 470 nm light irradiation. | 8     |

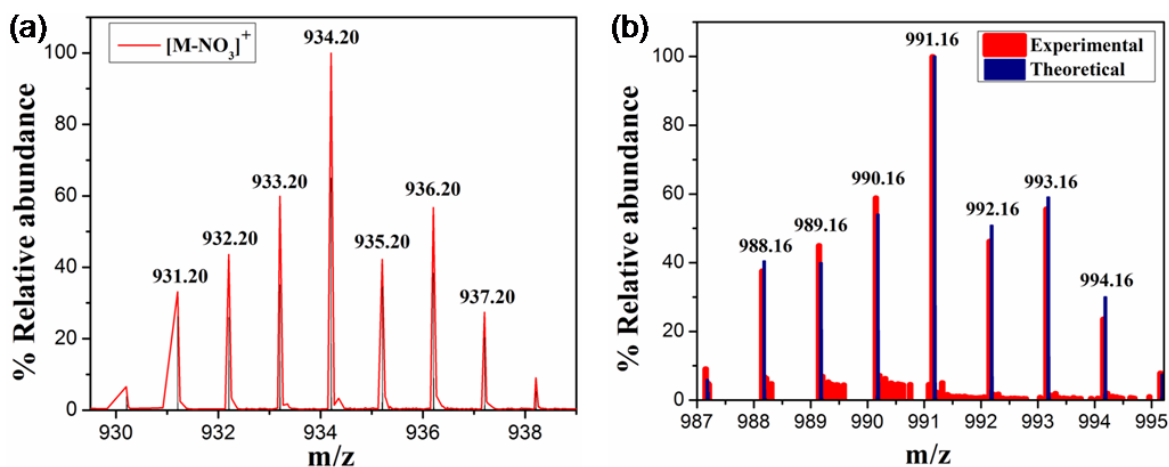

**Figure S1.** ESI-MS spectra of the compounds obtained in MeOH (a) Experimental (red lines) and the calculated (black lines) isotopic pattern of the crossed aldol product **[1-Ac]**. (b) Isotopic pattern for **[1](PF<sub>6</sub>)<sub>2</sub>** obtained experimentally (red column) compared to the calculated isotopic distributions.

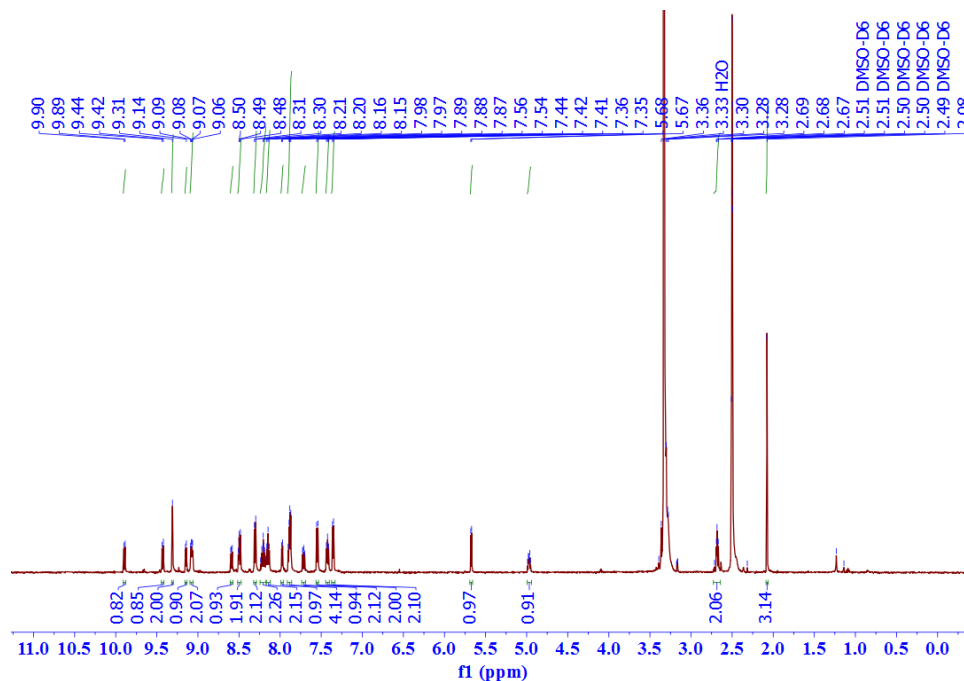

**Figure S2.** <sup>1</sup>H NMR of the pure product **[1-Ac]** obtained from column in DMSO-*d*<sub>6</sub>.

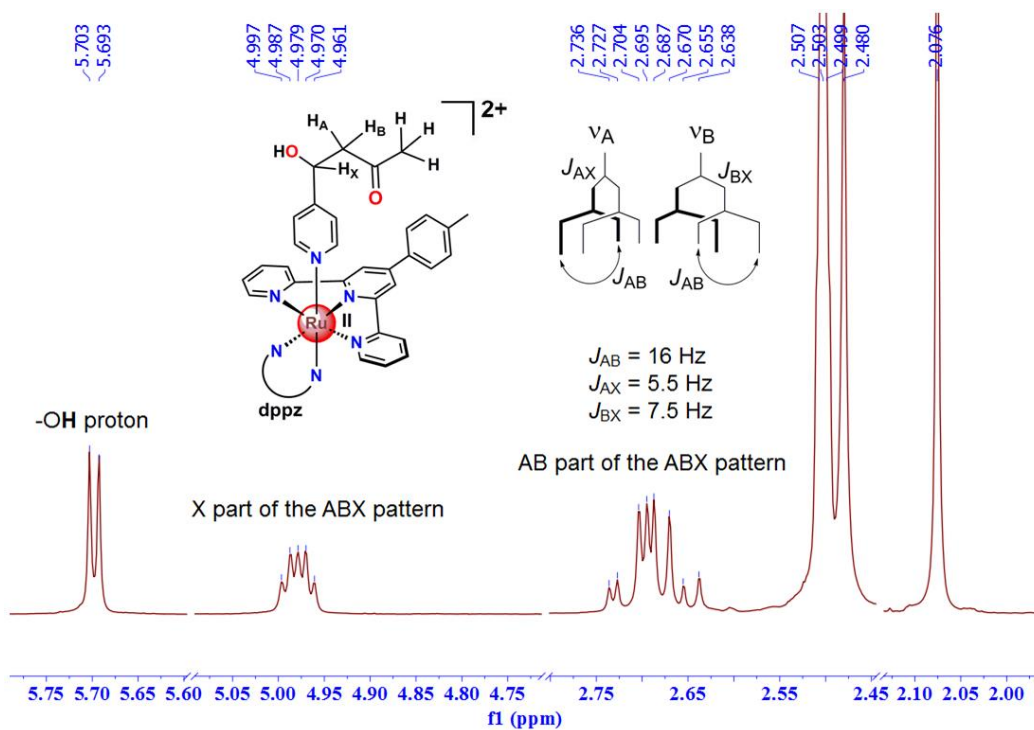

**Figure S3.** Second order complex coupling pattern in between the diastereotopic methylene protons A and B with the X proton in [1-Ac].

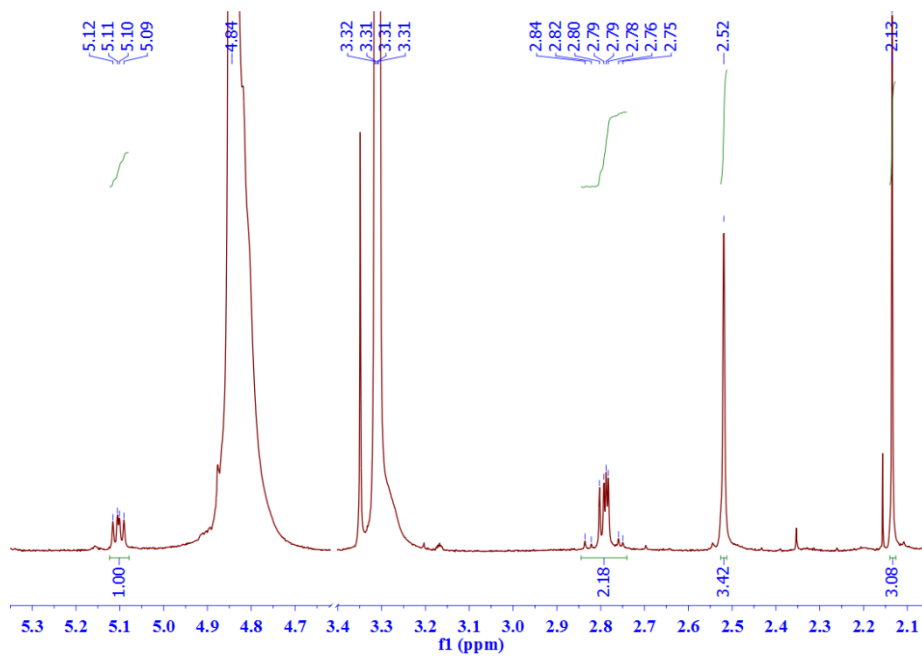

**Figure S4.** Expanded  $^1\text{H}$  NMR spectrum of [1-Ac] in  $\text{CD}_3\text{OD}$ . The  $H_X$  proton was observed as a doublet of doublet at 5.11 ppm.

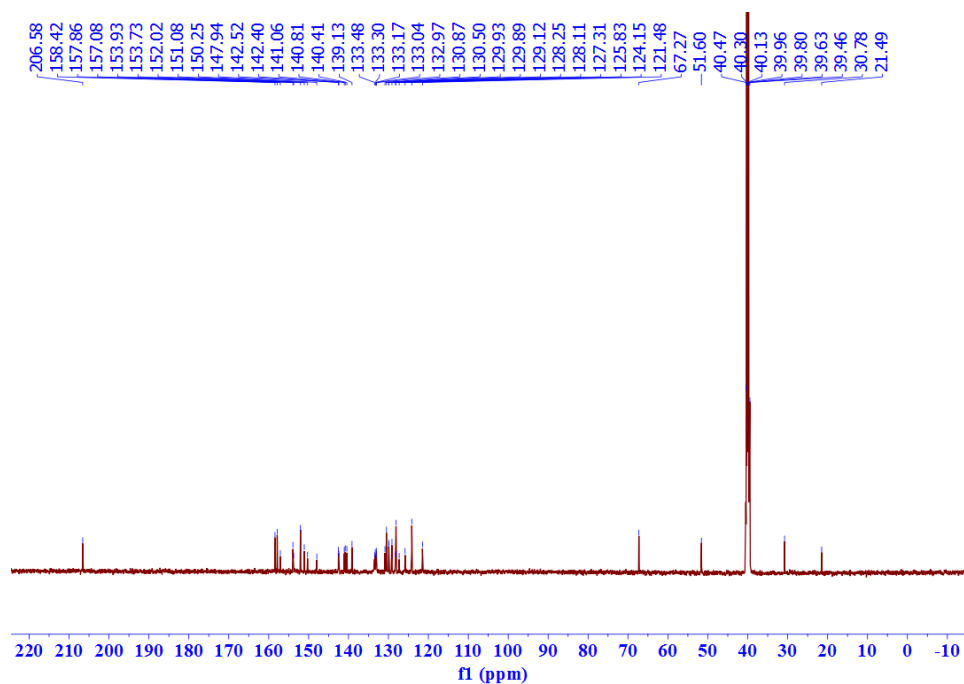

**Figure S5.**  $^{13}\text{C}$  NMR spectra of [1-Ac] in  $\text{DMSO-}d_6$  at 125 MHz.

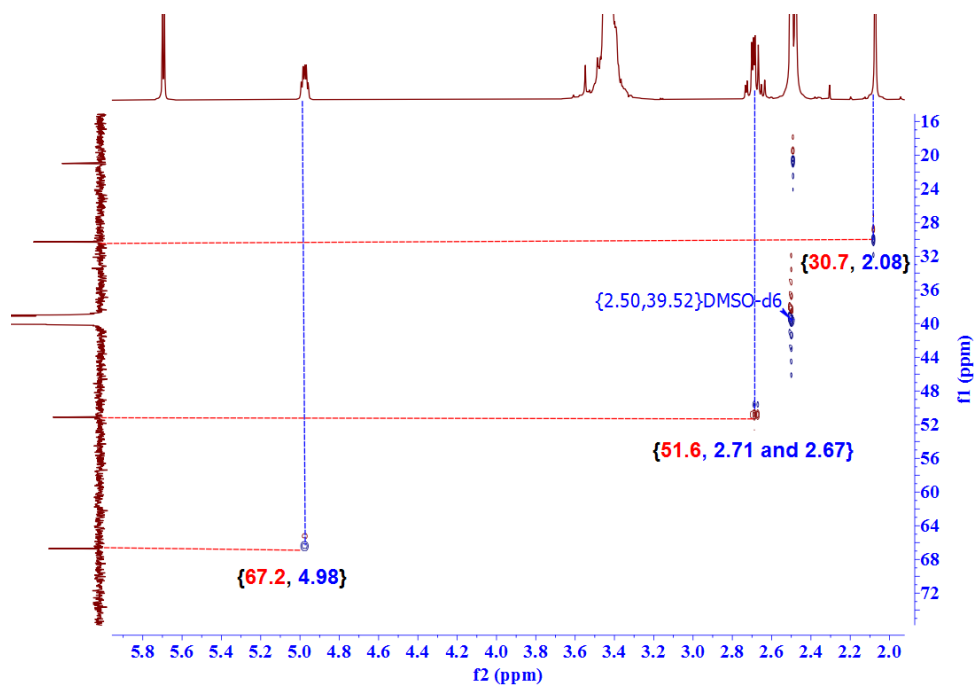

**Figure S6.**  $^1\text{H-}^{13}\text{C}$  HSQC spectrum of [1-Ac] in  $\text{DMSO-}d_6$  establishes the identity of the aliphatic region  $^{13}\text{C}$  peaks associated with the aldol adduct of the coordinated 4-pyridine carboxaldehyde ligand.

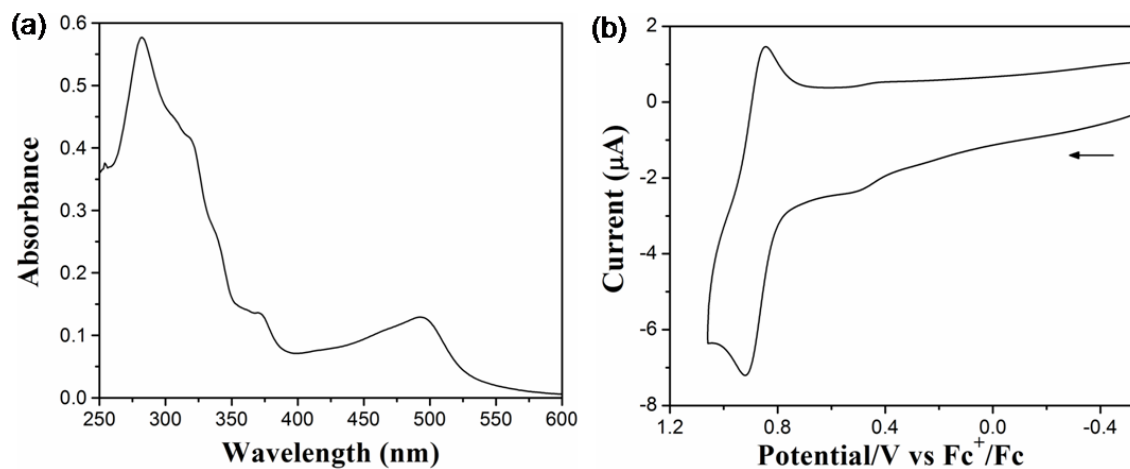

**Figure S7.** Electronic absorption spectra and cyclic voltammetry of [**1-Ac**]. (a) UV–vis spectrum of [**1-Ac**] in DMSO. (b) Cyclic voltammetric plot of [**1-Ac**] in acetonitrile depicting the oxidation side of the CV diagram.

**Table S1.** Selected bond distances (Å) of [**1-Ac**].

| Compound        | Ru1-N1   | Ru1-N2   | R1-N3    | Ru1-N4   | Ru1-N5   | Ru1-N6   |
|-----------------|----------|----------|----------|----------|----------|----------|
| [ <b>1-Ac</b> ] | 2.068(3) | 1.957(4) | 2.067(3) | 2.093(4) | 2.070(3) | 2.120(3) |

**Table S2.** Selected bond angles (degree) for [1-Ac].

| Angles    | Values   |
|-----------|----------|
| N1-Ru1-N2 | 79.5(1)  |
| N1-Ru1-N3 | 159.3(1) |
| N1-Ru1-N4 | 100.3(1) |
| N1-Ru1-N5 | 91.6(1)  |
| N1-Ru1-N6 | 89.2(1)  |
| N2-Ru1-N3 | 79.8(1)  |
| N2-Ru1-N4 | 173.0(1) |
| N2-Ru1-N5 | 93.9(1)  |
| N2-Ru1-N6 | 91.0(1)  |
| N3-Ru1-N4 | 100.1(1) |
| N3-Ru1-N5 | 89.5(1)  |
| N3-Ru1-N6 | 91.4(1)  |
| N4-Ru1-N5 | 79.1(1)  |
| N4-Ru1-N6 | 96.0(1)  |
| N5-Ru1-N6 | 175.1(1) |

**Table S3.** Refinement details and crystallographic parameters of the crystal structure of [**1-Ac**].

| Empirical formula                                             | C <sub>106</sub> H <sub>96</sub> N <sub>26</sub> O <sub>25</sub> Ru <sub>2</sub> |
|---------------------------------------------------------------|----------------------------------------------------------------------------------|
| Formula weight                                                | 2336.22                                                                          |
| Temperature/K                                                 | 100.0                                                                            |
| Crystal system                                                | monoclinic                                                                       |
| Space group                                                   | <i>P</i> 2 <sub>1</sub> / <i>c</i>                                               |
| <i>a</i> /Å                                                   | 11.809(3)                                                                        |
| <i>b</i> /Å                                                   | 20.790(6)                                                                        |
| <i>c</i> /Å                                                   | 21.430(6)                                                                        |
| $\alpha$ /°                                                   | 90                                                                               |
| $\beta$ /°                                                    | 102.404(8)                                                                       |
| $\gamma$ /°                                                   | 90                                                                               |
| Volume/Å <sup>3</sup>                                         | 5138(2)                                                                          |
| <i>Z</i>                                                      | 2                                                                                |
| $\rho_{\text{calc}}$ /cm <sup>3</sup>                         | 1.510                                                                            |
| $\mu$ /mm <sup>-1</sup>                                       | 0.385                                                                            |
| <i>F</i> (000)                                                | 2404.0                                                                           |
| Radiation                                                     | MoK $\alpha$ ( $\lambda$ = 0.71073)                                              |
| 2 $\Theta$ range for data collection/°                        | 4.66 to 56.812                                                                   |
| Index ranges                                                  | -15 ≤ <i>h</i> ≤ 15, -27 ≤ <i>k</i> ≤ 27, -28 ≤ <i>l</i> ≤ 28                    |
| Reflections collected                                         | 105756                                                                           |
| Independent reflections                                       | 12796 [ <i>R</i> <sub>int</sub> = 0.0930, <i>R</i> <sub>sigma</sub> = 0.0535]    |
| Data/restraints/parameters                                    | 12796/177/810                                                                    |
| Goodness-of-fit on <i>F</i> <sup>2</sup>                      | 1.095                                                                            |
| Final <i>R</i> indexes [ <i>I</i> >= 2 $\sigma$ ( <i>I</i> )] | <i>R</i> <sub>1</sub> = 0.0682, <i>wR</i> <sub>2</sub> = 0.1510                  |
| Final <i>R</i> indexes [all data]                             | <i>R</i> <sub>1</sub> = 0.0925, <i>wR</i> <sub>2</sub> = 0.1635                  |
| Largest diff. peak/hole / e Å <sup>-3</sup>                   | 1.38/-0.85                                                                       |

$$R_1 = \frac{\sum ||F_o| - |F_c||}{\sum |F_o|}; \quad wR_2 = \sqrt{\frac{\sum [w(F_o^2 - F_c^2)^2]}{\sum [w(F_o^2)^2]}}$$

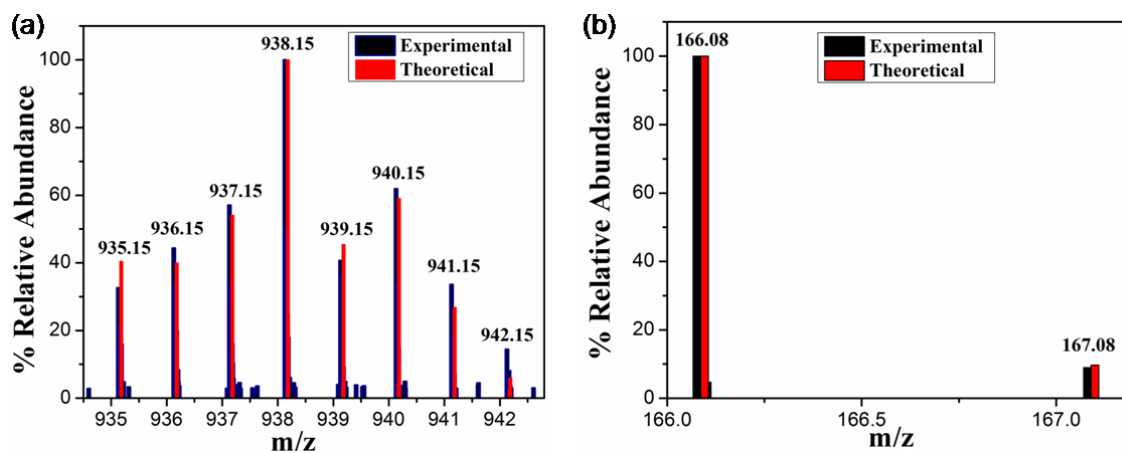

**Figure S8.** ESI-MS-based characterization of the photoproduct obtained from the photoreactivity study of [1-Ac] upon blue LED irradiation in DMSO- $d_6$ . (a) The experimental isotopic pattern in comparison with the theoretically calculated values for  $\{[\text{Ru}(\text{ttp})(\text{dppz})(\text{DMSO}-d_6)]^{2+} + 2[\text{NO}_3^-] + \text{Na}^+\}$ . (b) ESI-MS plot of the released ligand obtained as  $[\text{M} + \text{H}]^+$ .
